# Supplementary material for: Comparative Analysis of In-House RT-qPCR Detection of SARS-CoV-2 for Resource-Constrained Settings
Source: MDPI journal article supplement (doi:10.3390/diagnostics12112883), 2022-11-21
Supplement: s1 [file s1]

## Supplementary information

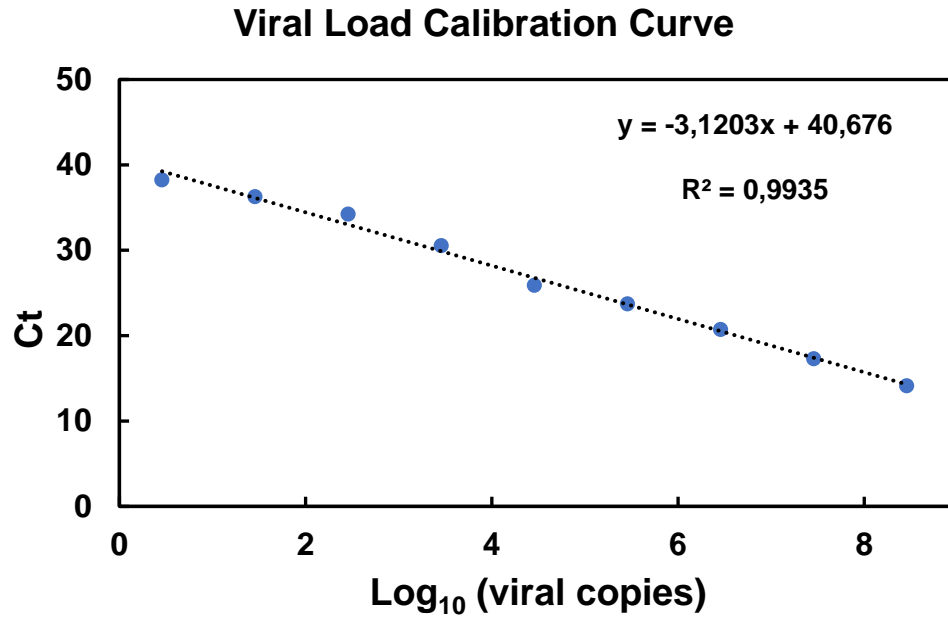

**Figure S1.** Calibration curve of the relationship between the number of viral copies (SARS-CoV-2) and Ct value from a diagnostic RT-qPCR. The calculation of the calibration line from the serial dilution of the 3180pb pUC series plasmid containing specific sequences of the viral E and RdRp genes detected by RT-qPCR related to the Ct value.

**Table S1.** Viral copy number ratio in each RNA dilution factor for samples positive for SARS-CoV-2.

| Number of viral copies / $\mu\text{l}$ of RNA | Dilution           |
|-----------------------------------------------|--------------------|
| 33863040.84                                   | 1                  |
| 3386304.08                                    | $1 \times 10^{-1}$ |
| 338630.4                                      | $1 \times 10^{-2}$ |
| 33863.04                                      | $1 \times 10^{-3}$ |
| 3386.3                                        | $1 \times 10^{-4}$ |
| 338.64                                        | $1 \times 10^{-5}$ |
| 33.86                                         | $1 \times 10^{-6}$ |
| 3.38                                          | $1 \times 10^{-7}$ |
| 0.34                                          | $1 \times 10^{-8}$ |

**Table S2.** Ct readings of SARS-CoV-2 detection tests by RT-qPCR using the GeneFinder™ triplex and duplex COVID-19 Plus kits.

| GeneFinder™ COVID-19 Plus Kit |               |       |           |       |         | RT-qPCR Triplex |             |       |         | RT-qPCR Duplex <sup>E</sup> |             |         | RT-qPCR Duplex <sup>RdRp</sup> |       |         |
|-------------------------------|---------------|-------|-----------|-------|---------|-----------------|-------------|-------|---------|-----------------------------|-------------|---------|--------------------------------|-------|---------|
| Gene                          | IC            | RdRp  | E         | N     |         | IC              | E           | RdRp  |         | IC                          | E           |         | IC                             | RdRp  |         |
| Fluorophore                   | Cy5 - control | FAM   | Texas Red | VIC   | Outcome | HEX - Control   | Cal Red 610 | FAM   | Outcome | HEX - Control               | Cal Red 610 | Outcome | HEX - Control                  | FAM   | Outcome |
| Ct                            | 27,04         | 13,96 | 13,67     | 13,31 | +       | 36,53           | 14,03       | 18,17 | +       | 33,71                       | 15,15       | +       | 25,09                          | 19,31 | +       |
